# Supplementary material for: Uncovering the microbiome of invasive sympatric European brown hares and European rabbits in Australia
Source: PeerJ journal article supplement (doi:10.7717/peerj.9564), 2020-08-18

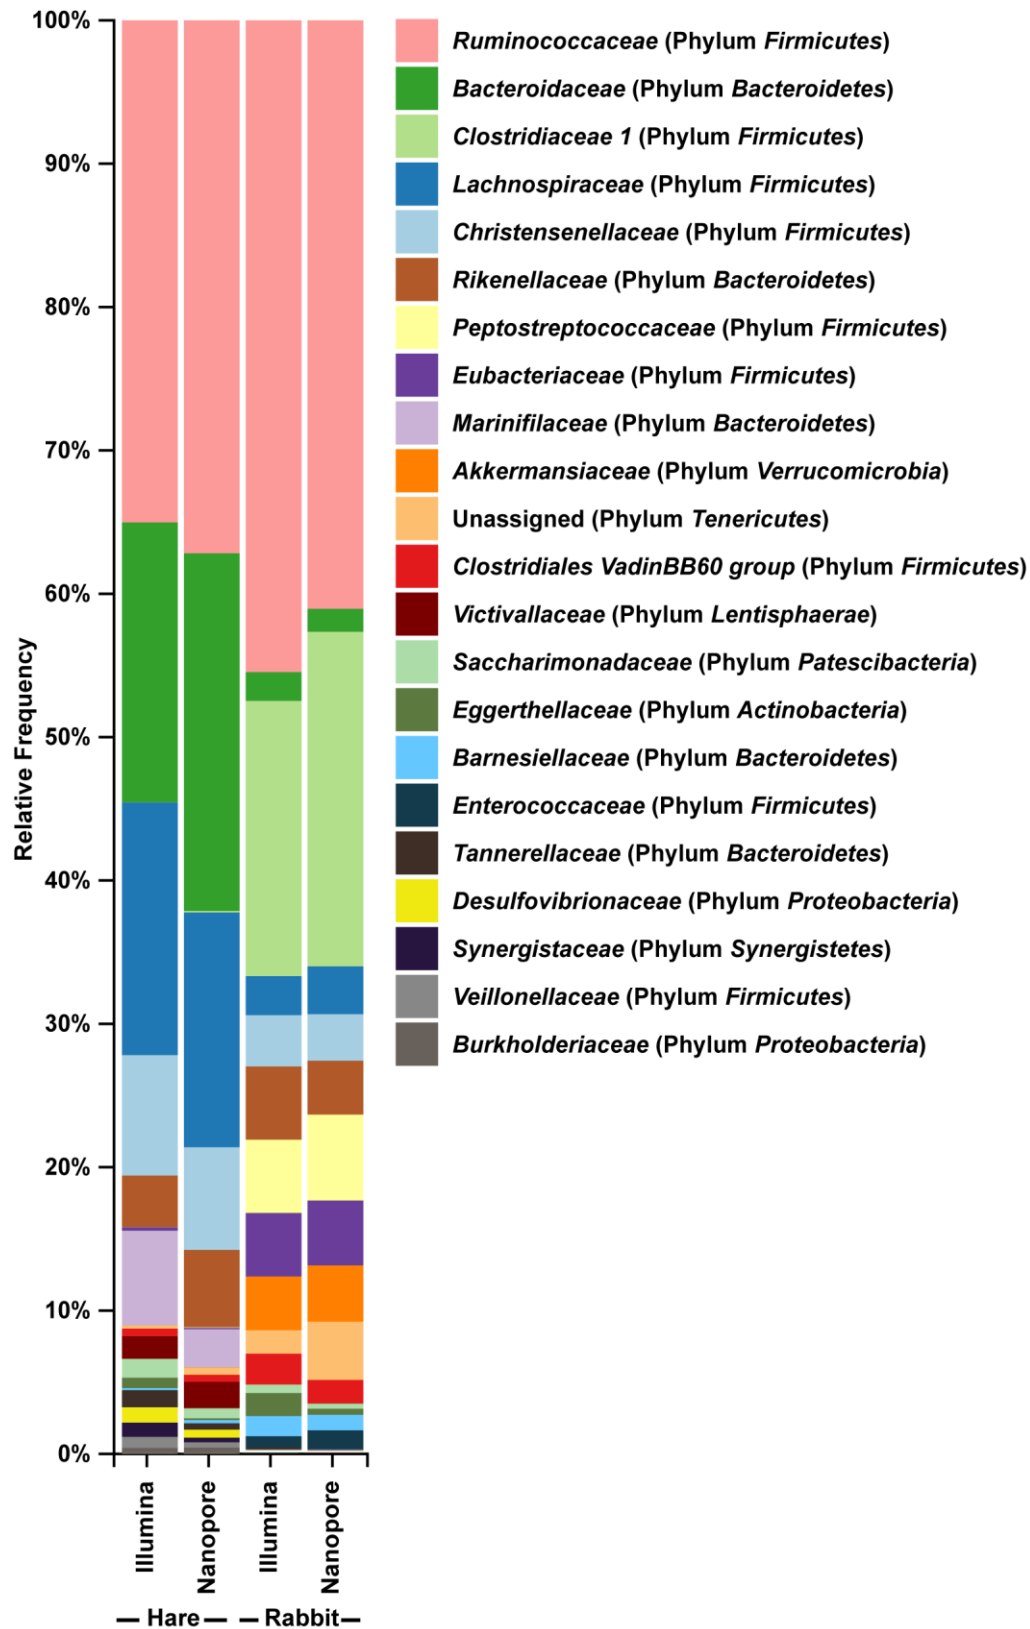

Supplement: Figure_S2_Shanmuganandam.pdf [file Figure_S2_Shanmuganandam.pdf]
